# Supplementary material for: Long-range migration of centrioles to the apical surface of the olfactory epithelium
Source: eLife journal article supplement (doi:10.7554/elife.74399), 2022-04-14
Supplement: supp [file elife-74399-supp-v1.zip]

Archive with 11 entries (11 files):
- elife_poa_e74399_Figure_1_figure_supplement_1.pdf
- elife_poa_e74399_Figure_3_figure_supplement_1.pdf
- elife_poa_e74399_Figure_4_figure_supplement_1.pdf
- elife_poa_e74399_Figure_5_figure_supplement_1.pdf
- elife_poa_e74399_Figure_2_source_data_1.xlsx
- elife_poa_e74399_Figure_5_source_data_1.xlsx
- elife_poa_e74399_Figure_5_figure_supplement_1_source_data_1.xlsx
- elife_poa_e74399_Figure_5_figure_supplement_1_source_data_2.xlsx
- elife_poa_e74399_Figure_2_video_1.avi
- elife_poa_e74399_Figure_2_video_2.avi
- elife_poa_e74399_Transparent_Reporting_File.pdf
