# Supplementary material for: Long-range migration of centrioles to the apical surface of the olfactory epithelium
Source: eLife journal article supplement (doi:10.7554/elife.74399), 2022-04-14
Supplement: supp [file elife-74399-supp-v1.zip › elife_poa_e74399_Figure_2_source_data_1.xlsx]

## Sheet: Sheet1
Figure 2 - Source Data 1
dissection	video	group/cluster	start time	start distance	end time	end distance	time travelled	distance travelled	average rate (microns / minute)
80	OE0-1	1	0	11.87	64	13.62	64	-1.75	-0.0273438
80	OE0-1	2	0	6.91	44	8.87	44	-1.96	-0.0445455
80	OE0-1	3	0	6.71	18	3.51	18	3.2	0.177778
80	OE1-1	1	0	3.72	22	2.99	22	0.73	0.0331818
80	OE1-1	2	0	6.29	34	4.13	34	2.16	0.0635294
80	OE1-1	3	0	4.54	32	5.06	32	-0.52	-0.01625
80	OE1-1	4	0	6.5	22	6.4	22	0.1	0.00454545
80	OE1-1	5	0	2.38	16	2.06	16	0.32	0.02
80	OE1-1	6	0	4.75	32	6.4	32	-1.65	-0.0515625
77	OE3	1	0	8.57	30	8.25	30	0.32	0.0106667
77	OE3	2	0	5.16	30	5.16	30	0	0
77	OE3	3	0	8.46	30	7.43	30	1.03	0.0343333
78	OE1-5	1	0	16.82	95	14.46	95	2.36	0.0248421
78	OE1-5	2	80	11.56	100	10.42	20	1.14	0.057
78	OE1-5	3	0	3.82	90	3.4	90	0.42	0.00466667
78	OE1-5	4	0	14.76	65	13.42	65	1.34	0.0206154
78	OE0	1	0	10.73	40	11.97	40	-1.24	-0.031
78	OE0	2	0	9.49	18	11.35	18	-1.86	-0.103333
78	OE0	3	0	8.36	20	8.67	20	-0.31	-0.0155
78	OE1-3	1	0	5.99	31	5.88	31	0.11	0.00354839
78	OE1-3	2	0	9.8	31	7.64	31	2.16	0.0696774
78	OE1-3	3	0	19.09	31	17.33	31	1.76	0.0567742
	total average	0.0132556	microns / minute
	average (forward-moving)	0.0415113	microns / minute
	average (backward-moving)	-0.0413621	microns / minute
