# Supplementary material for: Long-range migration of centrioles to the apical surface of the olfactory epithelium
Source: eLife journal article supplement (doi:10.7554/elife.74399), 2022-04-14
Supplement: supp [file elife-74399-supp-v1.zip › elife_poa_e74399_Figure_5_figure_supplement_1_source_data_1.xlsx]

## Sheet: Sheet1
	control sample 1, male	control sample 2, female
number of subapical migrating groups	5.59	3.3
number of middle and basal migrating groups	3.4	1.44
total absolute number of groups	217	79
Total basal length	2413.24	1666.99
