# Supplementary material for: Long-range migration of centrioles to the apical surface of the olfactory epithelium
Source: eLife journal article supplement (doi:10.7554/elife.74399), 2022-04-14
Supplement: supp [file elife-74399-supp-v1.zip › elife_poa_e74399_Figure_5_figure_supplement_1_source_data_2.xlsx]

## Sheet: Sheet1
	6 hours DMSO	6 hours nocodazole
number of subapical migrating groups	4.23	4.08
number of middle and basal migrating groups	1.11	2.22
total absolute number of groups	106	102
Total basal length	1984.36	1619.15
