# Supplementary material for: Long-range migration of centrioles to the apical surface of the olfactory epithelium
Source: eLife journal article supplement (doi:10.7554/elife.74399), 2022-04-14
Supplement: supp [file elife-74399-supp-v1.zip › elife_poa_e74399_Figure_5_source_data_1.xlsx]

## Sheet: Sheet1
Figure 5 - Source Data 1
	1 hour DMSO	1 hour paclitaxel	6 hours DMSO	6 hours paclitaxel
Combined:
normalized number of subapical migrating groups	1.92	2.65	2.13	5.49
normalized number of middle and basal migrating groups	1.01	1.66	0.44	1.37
total number of scored centriole groups	n=29	n=39	n=29	n=70
total basal length	l=988.17	l=905.37	l=1126.44	l=1019.76
Male:
normalized number of subapical migrating groups	1.82	2.96	3.21	6.37
normalized number of middle and basal migrating groups	0.61	1.11	0.8	1.11
total number of scored centriole groups	n=8	n=11	n=15	n=27
total basal length	l=329.07	l=270.27	l=373.95	l=360.79
Female:
normalized number of subapical migrating groups	1.97	2.52	1.59	5.01
normalized number of middle and basal migrating groups	1.21	1.89	0.27	1.52
total number of scored centriole groups	n=21	n=28	n=14	n=43
total basal length	l=659.1	l=635.1	l=752.49	l=658.97
