# Supplementary figures and images for: Long-range migration of centrioles to the apical surface of the olfactory epithelium
Source: eLife journal article supplement (doi:10.7554/elife.74399), 2022-04-14

**Figure 1 - Supplement 1**

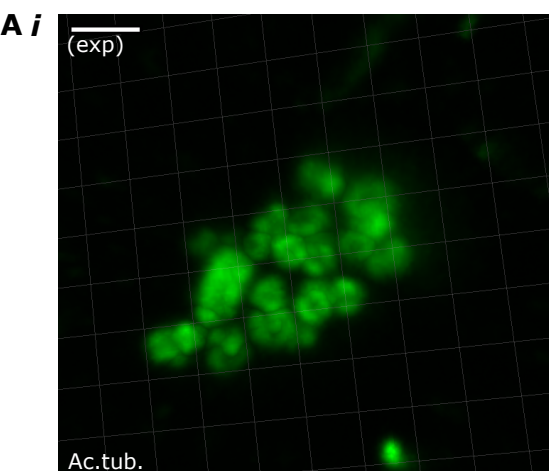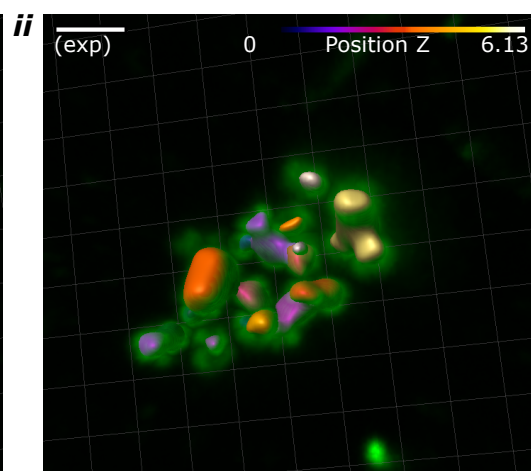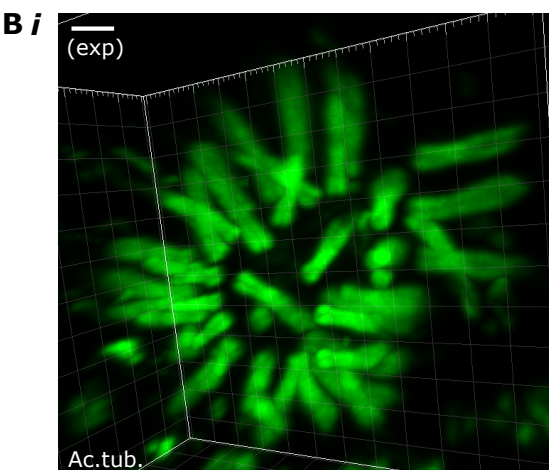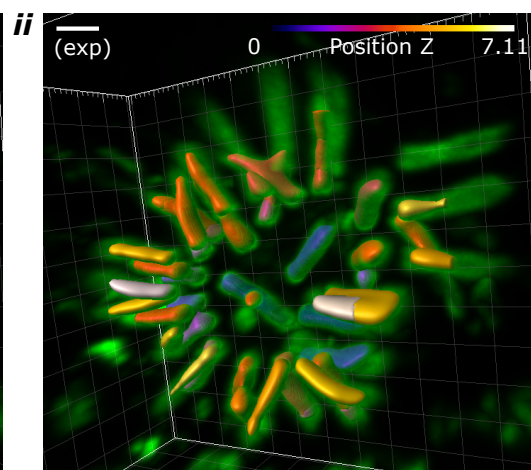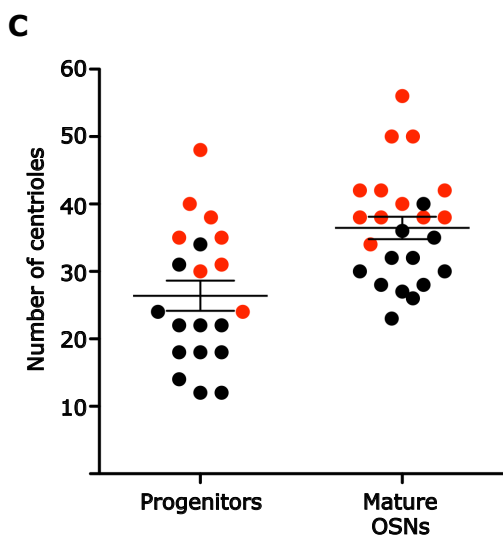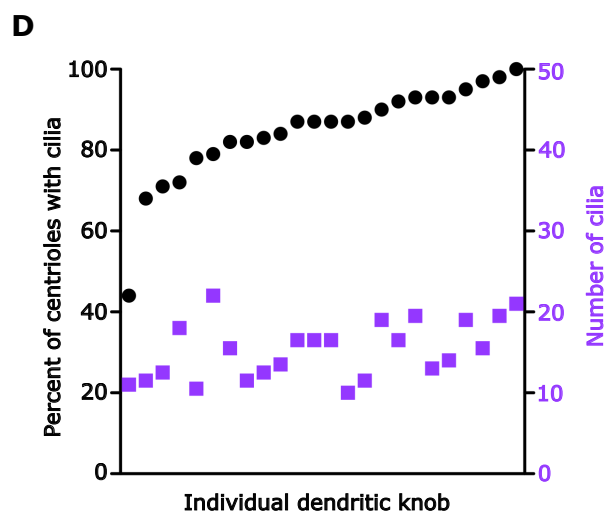

Supplement: supp [file elife-74399-supp-v1.zip › elife_poa_e74399_Figure_1_figure_supplement_1.pdf]

**Figure 3 - Supplement 1**

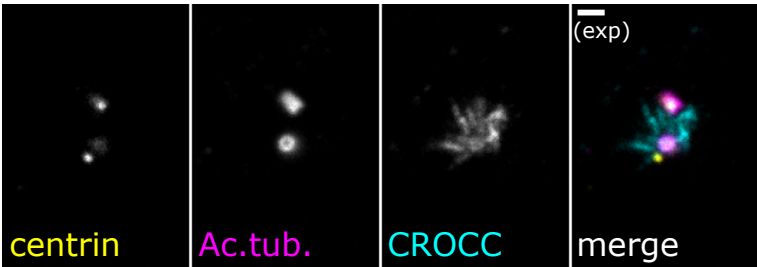

Supplement: supp [file elife-74399-supp-v1.zip › elife_poa_e74399_Figure_3_figure_supplement_1.pdf]

**Figure 4 - Supplement 1**

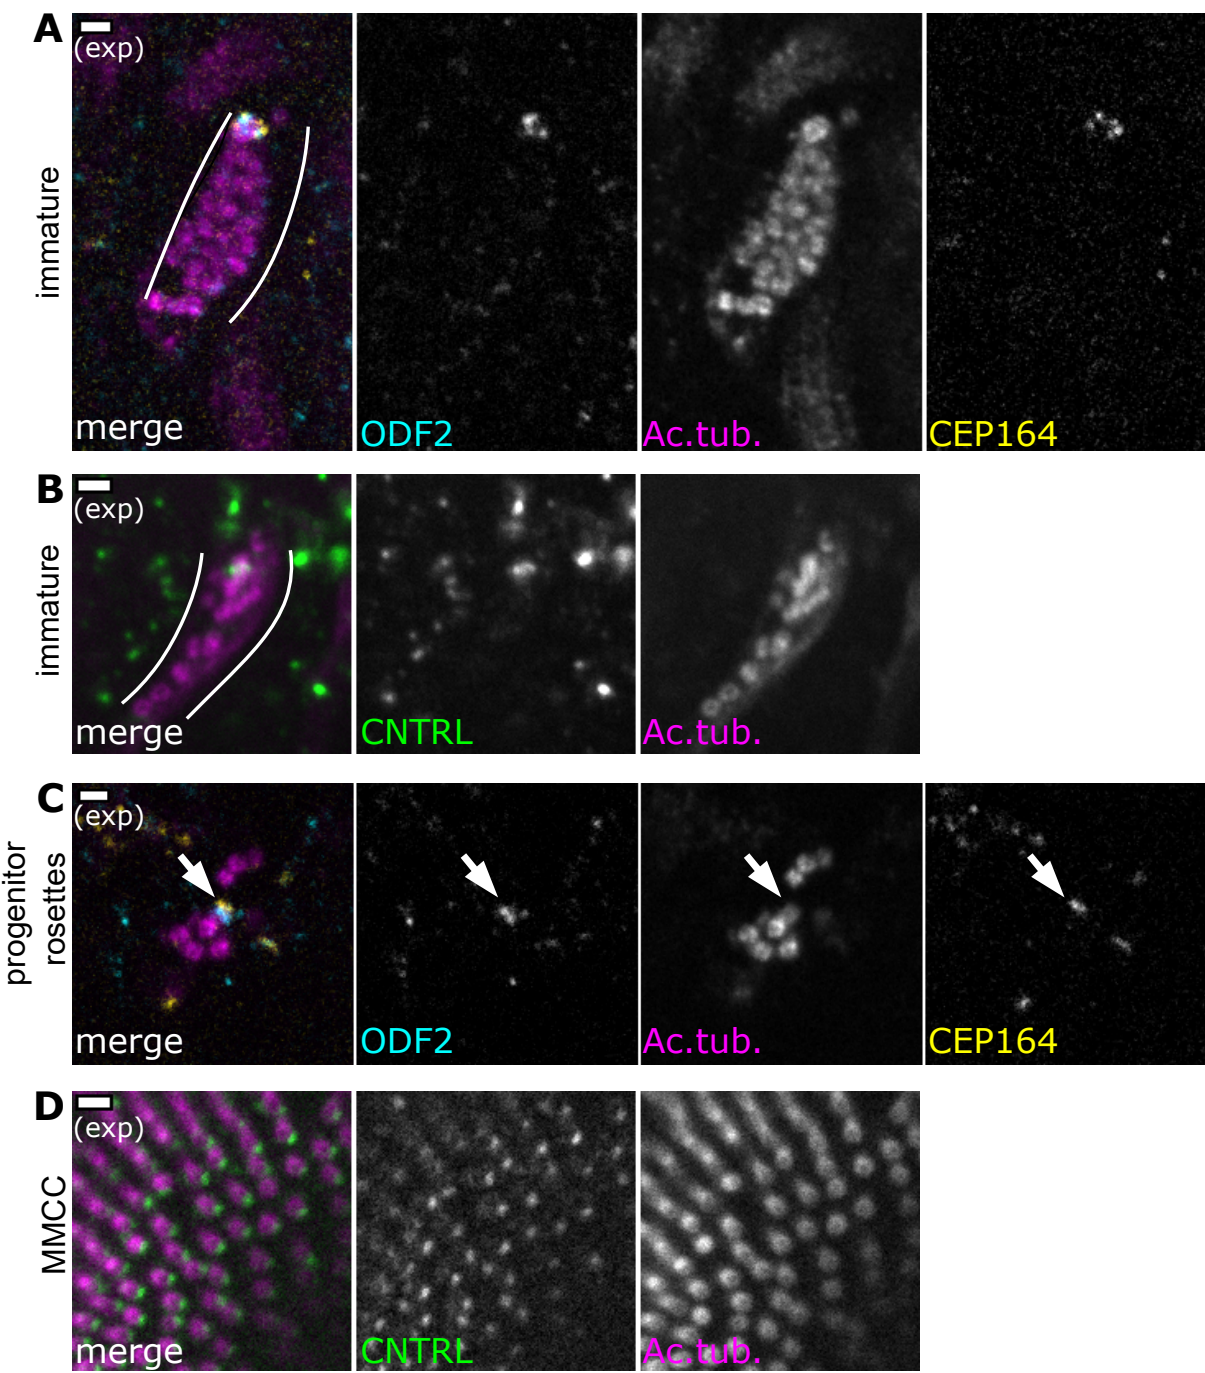

Supplement: supp [file elife-74399-supp-v1.zip › elife_poa_e74399_Figure_4_figure_supplement_1.pdf]

**Figure 5 - Supplement 1**

**A**

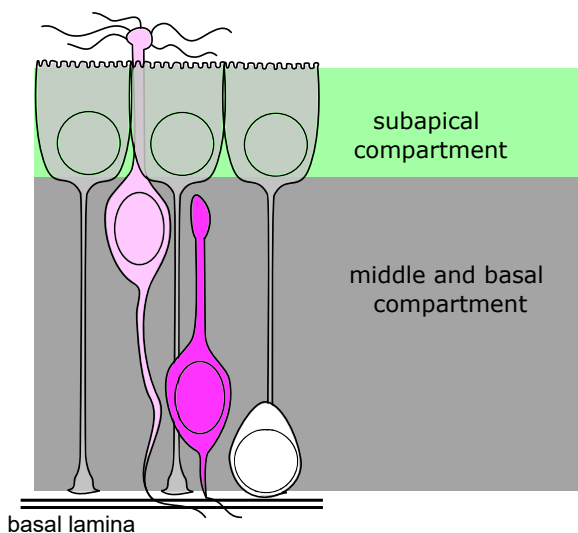

**B**

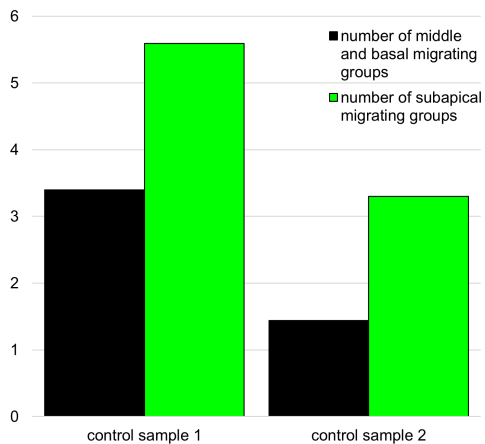

**C**

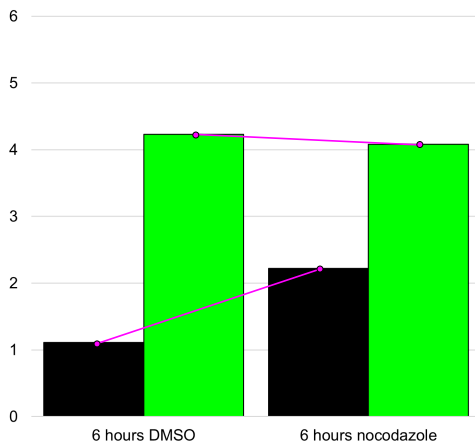

Supplement: supp [file elife-74399-supp-v1.zip › elife_poa_e74399_Figure_5_figure_supplement_1.pdf]
